# Supplementary material
Source: publisher figshare collection journal article supplement (https://acs.figshare.com/ndownloader/files/4372507)
Supplement: Supplementary file 1 [file 4372507]

## Supporting Information (Part I)

Material information for sucrose, glucose, and fructose obtained from the Sigma-Aldrich Co. (St. Louis, MO) and analyzed by the authors of this study.

|                   | Sucrose (cane sugar)                                                                                                                                                                                  | Glucose (D-(+)-glucose)                                                                        | Fructose (D-(-)-fructose)                                                           |
|-------------------|-------------------------------------------------------------------------------------------------------------------------------------------------------------------------------------------------------|------------------------------------------------------------------------------------------------|-------------------------------------------------------------------------------------|
|                   | 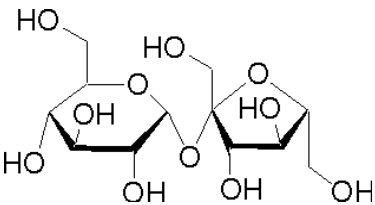                                                                                                                     |             |  |
| Synonyms          | $\alpha$ -D-Glc-(1 $\rightarrow$ 2)- $\beta$ -D-Fru,<br>D(+)-Saccharose, Sugar,<br>$\beta$ -D-Fructofuranosyl- $\alpha$ -D-glucopyranoside,<br>$\alpha$ -D-Glucopyranosyl $\beta$ -D-fructofuranoside | Dextrose                                                                                       | D-Levulose, fruit sugar                                                             |
| Empirical formula | C <sub>12</sub> H <sub>22</sub> O <sub>11</sub>                                                                                                                                                       | C <sub>6</sub> H <sub>12</sub> O <sub>6</sub>                                                  | C <sub>6</sub> H <sub>12</sub> O <sub>6</sub>                                       |
| Molecular weight  | 342.3                                                                                                                                                                                                 | 180.16                                                                                         | 180.16                                                                              |
| Grade             | For molecular biology                                                                                                                                                                                 | SigmaUltra                                                                                     | SigmaUltra                                                                          |
| Assay             | $\geq 99.5\%$ (GC)                                                                                                                                                                                    | 99.5% (GC)                                                                                     |                                                                                     |
| Melting point     | 185-187°C (lit.)                                                                                                                                                                                      | 150-152°C (lit.)                                                                               | 119-122°C (lit.)                                                                    |
| Absorbance        | A <sub>50%</sub> /260 < 0.15<br>A <sub>50%</sub> /280 < 0.15                                                                                                                                          | A <sub>1M</sub> /260, H <sub>2</sub> O < 0.02<br>A <sub>1M</sub> /280, H <sub>2</sub> O < 0.02 |                                                                                     |
| Solubility        |                                                                                                                                                                                                       | H <sub>2</sub> O: 1M at 20°C, clear, colorless                                                 | H <sub>2</sub> O: 1M at 20°C, clear, colorless                                      |
| Ignition residue  | <0.05% <sup>1</sup>                                                                                                                                                                                   | < 0.1% (as SO <sub>4</sub> )                                                                   | < 0.1%                                                                              |
| Loss              |                                                                                                                                                                                                       | < 0.1% loss on drying                                                                          |                                                                                     |
| Total impurities  | Free glucose with < 0.05% detection limit <sup>2</sup>                                                                                                                                                | Insoluble matter, passes filter test                                                           | < 0.0005% Phosphorus (P)<br>< 0.05% Glucose (enzymatic)<br>< 0.1% Insoluble matter  |

<sup>1</sup>Determined using sulfated ash method by Tale & Lyle, Decatur, IL <sup>2</sup>The sucrose was assayed as a Trimethylsilyl (TMS) derivative by gas liquid chromatography (GLC). Value provided via personal communication by the Technical Department at Sigma-Aldrich Co. (St. Louis, MO.)

(Cont.)

|                            | Sucrose (cane sugar)                                                                                                                                                                           | Glucose (D-(+)-glucose)                                                                                                                             | Fructose (D-(-)-fructose)                                                                                                                           |
|----------------------------|------------------------------------------------------------------------------------------------------------------------------------------------------------------------------------------------|-----------------------------------------------------------------------------------------------------------------------------------------------------|-----------------------------------------------------------------------------------------------------------------------------------------------------|
| Anion traces <sup>3</sup>  | Chloride (Cl <sup>-</sup> ): 4 ppm<br>Nitrate (NO <sub>3</sub> <sup>-</sup> ): 1 ppm<br>Sulfate (SO <sub>4</sub> <sup>2-</sup> ): 3 ppm<br>Phosphate (PO <sub>4</sub> <sup>3-</sup> ): < 1 ppm | Chloride (Cl <sup>-</sup> ): < 50 ppm<br>Sulfate (SO <sub>4</sub> <sup>2-</sup> ): < 50 ppm                                                         | Chloride (Cl <sup>-</sup> ): < 500 ppm<br>Sulfate (SO <sub>4</sub> <sup>2-</sup> ): < 500 ppm                                                       |
| Cation traces <sup>4</sup> | Ca: 0.25 ppm<br>Fe: None found<br>K: 8.34 ppm<br>Mg: 0.20 ppm<br>Na: 0.81 ppm<br>P: 0.82 ppm<br>Pb: < 5 ppm <sup>5</sup><br>S: 10.91 ppm<br>Si: 0.74 ppm<br>Zn: 0.33 ppm                       | Al: < 5 ppm<br>As: < 1 ppm<br>Ba: < 5 ppm<br>Bi: < 5 ppm<br>Ca: < 10 ppm<br>Cd: < 5 ppm<br>Co: < 5 ppm<br>Cr: < 5 ppm<br>Cu: < 5 ppm<br>Fe: < 5 ppm | K: < 50 ppm<br>Li: < 5 ppm<br>Mg: < 5 ppm<br>Mn: < 5 ppm<br>Mo: < 5 ppm<br>Na: < 50 ppm<br>Ni: < 5 ppm<br>Pb: < 5 ppm<br>Sr: < 5 ppm<br>Zn: < 5 ppm |

<sup>3</sup>Anion traces for sucrose were analyzed using Ion Chromatography by Tate & Lyle, Decatur, IL. <sup>4</sup>Cation traces for sucrose were analyzed using Inductively Coupled Plasma Optical Emission Spectrometry by Microanalysis Laboratory at the University of Illinois at Urbana-Champaign, IL.

<sup>5</sup>Heavy metals (as Pb) reported by Sigma-Aldrich was < 5 ppm.

## Supporting Information

Material information for mannitol obtained from the Sigma-Aldrich Co.

| D-Mannitol                                                                          |                                                                                 |                                        |
|-------------------------------------------------------------------------------------|---------------------------------------------------------------------------------|----------------------------------------|
| 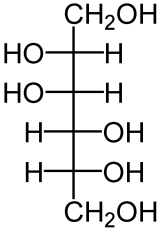 |                                                                                 |                                        |
| Synonyms                                                                            | Mannite                                                                         |                                        |
| Empirical formula                                                                   | C <sub>6</sub> H <sub>14</sub> O <sub>6</sub>                                   |                                        |
| Molecular weight                                                                    | 182.17                                                                          |                                        |
| Grade                                                                               | SigmaUltra                                                                      |                                        |
| Assay                                                                               | ≥ 99.9%                                                                         |                                        |
| Melting point                                                                       | 167-170°C (lit.)                                                                |                                        |
| Solubility                                                                          | H <sub>2</sub> O: 1M at 20°C, clear, colorless                                  |                                        |
| Ignition residue                                                                    | < 0.01%                                                                         |                                        |
| Total impurities                                                                    | < 0.0005% Phosphorus (P)      < 0.01% Insoluble matter                          |                                        |
| Anion traces                                                                        | Chloride (Cl): < 50 ppm      Sulfate (SO <sub>4</sub> <sup>2-</sup> ): < 50 ppm |                                        |
| Cation traces                                                                       | Al: < 5 ppm                                                                     | Mg: < 5 ppm                            |
|                                                                                     | Ca: < 5 ppm                                                                     | NH <sub>4</sub> <sup>+</sup> : < 5 ppm |
|                                                                                     | Cu: < 5 ppm                                                                     | Na: < 50 ppm                           |
|                                                                                     | Fe: < 5 ppm                                                                     | Pb: < 10 ppm                           |
|                                                                                     | K: < 50 ppm                                                                     | Zn: < 5 ppm                            |
